# Supplementary material for: Genetic Structural Differentiation Analyses of Intercontinental Populations and Ancestry Inference of the Chinese Hui Group Based on a Novel Developed Autosomal AIM-InDel Genotyping System
Source: Biomed Res Int. 2020 Aug 25;2020:2124370. doi: 10.1155/2020/2124370 (PMC7468629; doi:10.1155/2020/2124370)
Supplement: Supplementary 3 — Supplementary Table 3: the ancestry components of 27 populations calculated by STRUCTURE v2.3.4 based on raw genotype results of the same 38 InDels. [file 2124370.f3.xlsx]

## Sheet: Supplementary Table 3
Supplementary Table 3: The ancestry components of 27 populations calculated by STRUCTURE v2.3.4 based on raw genotype results of the same 38 InDels.
Populations	Cluster 1	Cluster 2	Cluster 3	Sample Sizes
ACB	0.0305	0.0883	0.8812	96
ASW	0.0554	0.1853	0.7593	61
ESN	0.0126	0.0194	0.968	99
GWD	0.0232	0.0229	0.9539	113
LWK	0.0204	0.0212	0.9584	99
MSL	0.0177	0.0179	0.9644	85
YRI	0.0157	0.018	0.9663	108
CEU	0.0139	0.965	0.0211	99
FIN	0.0281	0.9536	0.0183	99
GBR	0.0129	0.9604	0.0267	91
IBS	0.0144	0.9554	0.0302	107
TSI	0.0174	0.9455	0.0371	107
CDX	0.9681	0.0197	0.0121	93
CHB	0.9682	0.0181	0.0137	103
CHS	0.9717	0.0173	0.011	105
JPT	0.9581	0.0183	0.0236	104
KHV	0.9623	0.0232	0.0145	99
XJH	0.8887	0.0786	0.0327	509
CLM	0.1004	0.8052	0.0944	94
MXL	0.3434	0.5917	0.0649	64
PEL	0.6372	0.2865	0.0763	85
PUR	0.0505	0.7967	0.1528	104
BEB	0.3579	0.586	0.0561	86
GIH	0.2491	0.7057	0.0452	103
ITU	0.2471	0.6982	0.0547	102
PJL	0.1554	0.8052	0.0394	96
STU	0.2961	0.6479	0.0561	102
Note 1, ACB, African Caribbean in Barbados; ASW, African Ancestry in Southwest USA; ESN, Esan in Nigeria; GWD, Gambian in Western Division, Mandinka; LWK, Luhya in Webuye, Kenya; MSL, Mende in Sierra Leone; YRI, Yoruba in Ibadan, Nigeria; CLM, Colombian in Medellin, Colombia; MXL, Mexican Ancestry in Los Angeles, California; PEL, Peruvian in Lima, Peru; PUR, Puerto Rican in Puerto Rico; CDX, Chin…
Note 2,cluster 1, the proportion of East Asian cluster; cluster 2, the proportion of African cluster; cluster 3, the proportion of European cluster.
